# Supplementary material for: Identification of enzymatic genes with the potential to reduce biomass recalcitrance through lignin manipulation in Arabidopsis
Source: PubMed Central journal article supplement (PMC7260809; doi:10.1186/s13068-020-01736-6), 2020-05-29
Supplement: 13068_2020_1736_MOESM1_ESM.pdf [file 13068_2020_1736_MOESM1_ESM.pdf]

**Table S1.** List of genes used for lignin modification.

| Gene              | Function                                                                              | Organism                                  | Kingdom       | Locus tag/<br>Gene symbol  | Accession                                              | Reference |
|-------------------|---------------------------------------------------------------------------------------|-------------------------------------------|---------------|----------------------------|--------------------------------------------------------|-----------|
| <i>F5H</i>        | ferulic acid 5-hydroxylase                                                            | <i>Arabidopsis thaliana</i>               | Viridiplantae | AT4G36220                  | AEE86636                                               | [1]       |
| <i>3AT2</i>       | coumaroyl-CoA:anthocyanidin 3- <i>O</i> -glucoside-6"- <i>O</i> -coumaroyltransferase | <i>Arabidopsis thaliana</i>               | Viridiplantae | AT1G03495                  | AAF86513                                               | [2]       |
| <i>ACT</i>        | agmatine coumaroyltransferase                                                         | <i>Hordeum vulgare</i>                    | Viridiplantae | –                          | BAF97626                                               | [3]       |
| <i>AT208</i>      | anthocyanidin 3- <i>O</i> -glucoside 6'- <i>O</i> -acyltransferase                    | <i>Perilla frutescens</i>                 | Viridiplantae | –                          | BAA93475                                               | [4]       |
| <i>Atu1417</i>    | enoyl-CoA hydratase                                                                   | <i>Agrobacterium fabrum</i> C58           | Bacteria      | Atu1417                    | AAK87210                                               | [5]       |
| <i>Balat_0669</i> | chlorogenic acid esterase                                                             | <i>Bifidobacterium animalis</i> DSM 10140 | Bacteria      | Balat_0669                 | ACS47609                                               | [6]       |
| <i>BrRCD</i>      | caffeic acid 4,5-dioxygenase                                                          | <i>Bradyrhizobium</i> sp. ORS278          | Bacteria      | BRADO_RS26060              | WP_012029184                                           | [7]       |
| <i>C2H</i>        | <i>p</i> -coumaroyl 2'-hydroxylase                                                    | <i>Ipomoea batatas</i>                    | Viridiplantae | –                          | BAL22347                                               | [8]       |
| <i>CA9OMT</i>     | coniferyl alcohol 9- <i>O</i> -methyltransferase                                      | <i>Linum nodiflorum</i>                   | Viridiplantae | –                          | ABX71750                                               | [9]       |
| <i>CADH</i>       | coniferyl alcohol dehydrogenase                                                       | <i>Streptomyces</i> sp. NL15-2K           | Bacteria      | –                          | BAN09098                                               | [10]      |
| <i>CALipB</i>     | lipase B                                                                              | <i>Moesziomyces antarcticus</i>           | Fungi         | –                          | CAA83122                                               | [11]      |
| <i>calA</i>       | coniferyl alcohol dehydrogenase                                                       | <i>Pseudomonas</i> sp. HR199              | Bacteria      | –                          | CAB69495                                               | [12]      |
| <i>calB</i>       | coniferyl aldehyde dehydrogenase                                                      | <i>Pseudomonas</i> sp. HR199              | Bacteria      | –                          | CAA06926                                               | [13]      |
| <i>CASHT</i>      | hydroxycinnamoyl-CoA: serotonin <i>N</i> -(hydroxycinnamoyl)transferase               | <i>Capsicum annuum</i>                    | Viridiplantae | LOC107839132               | AAK15312                                               | [14]      |
| <i>CCMT1</i>      | cinnamic acid/ <i>p</i> -coumaric acid carboxyl methyltransferase                     | <i>Ocimum basilicum</i>                   | Viridiplantae | –                          | ABG75942                                               | [15]      |
| <i>CGT</i>        | chlorogenic acid: glucaric acid caffeoyltransferase                                   | <i>Solanum lycopersicum</i>               | Viridiplantae | LOC101265588               | CBV37053                                               | [16]      |
| <i>CHS5</i>       | chalcone synthase                                                                     | <i>Glycine max</i>                        | Viridiplantae | GLYMA_08G109200            | AAB01004                                               | [17]      |
| <i>couA</i>       | hydroxycinnamoyl-CoA hydratase-lyase                                                  | <i>Rhodopseudomonas palustris</i> CGA009  | Bacteria      | RPA1786                    | CAE27227                                               | [18]      |
| <i>CURS3</i>      | curcumin synthase                                                                     | <i>Curcuma longa</i>                      | Viridiplantae | –                          | BAH85781                                               | [19]      |
| <i>CYP84A4</i>    | <i>p</i> -coumaraldehyde 3-hydroxylase                                                | <i>Arabidopsis thaliana</i>               | Viridiplantae | At5g04330                  | AED90728                                               | [20]      |
| <i>CYP98A22</i>   | <i>p</i> -coumaroyl 2'-hydroxylase                                                    | <i>Ruta graveolens</i>                    | Viridiplantae | CYP98A22                   | AEG19446                                               | [21]      |
| <i>F6H1</i>       | feruloyl-CoA 6'-hydroxylase                                                           | <i>Arabidopsis thaliana</i>               | Viridiplantae | AT3G13610                  | AEE75382                                               | [22]      |
| <i>FDC1</i>       | phenacrylic acid decarboxylase                                                        | <i>Saccharomyces cerevisiae</i> S288C     | Fungi         | YDR539W                    | DAA12368                                               | [23]      |
| <i>HCALDH</i>     | hydroxycinnamaldehyde dehydrogenase                                                   | <i>Arabidopsis thaliana</i>               | Viridiplantae | AT3G24503                  | AEE76907                                               | [24]      |
| <i>HCBT</i>       | anthranilic acid <i>N</i> -hydroxycinnamoyl /benzoyltransferase                       | <i>Dianthus caryophyllus</i>              | Viridiplantae | –                          | CAB06427                                               | [25]      |
| <i>HCT2</i>       | malic acid <i>O</i> -hydroxycinnamoyl transferase                                     | <i>Trifolium pratense</i>                 | Viridiplantae | –                          | ACI16631                                               | [26]      |
| <i>HHT1</i>       | omega-hydroxypalmitic acid <i>O</i> -feruloyl transferase                             | <i>Arabidopsis thaliana</i>               | Viridiplantae | AT5G41040                  | AED94628                                               | [27]      |
| <i>ligL</i>       | β-aryl ether <i>Cα</i> -dehydrogenase                                                 | <i>Sphingobium</i> sp. SYK-6              | Bacteria      | SLG_33660                  | BAK68041                                               | [28]      |
| <i>OsHCT4</i>     | glycerol <i>O</i> -hydroxycinnamoyltransferase                                        | <i>Oryza sativa</i>                       | Viridiplantae | OSNPB_060185500            | BAS96510                                               | [29]      |
| <i>padC</i>       | phenolic acid decarboxylase                                                           | <i>Bacillus subtilis</i> 168              | Bacteria      | BSU34400                   | CAB15445                                               | [30]      |
| <i>pcaHG</i>      | protocatechuic acid 3,4-dioxygenase                                                   | <i>Stenotrophomonas maltophilia</i> KB2   | Bacteria      | –                          | AFH89645 ( <i>pcaH</i> )<br>AFH89644 ( <i>pcaG</i> )   | [31]      |
| <i>pcaH2G2</i>    | protocatechuic acid 3,4-dioxygenase                                                   | <i>Hydrogenophaga intermedia</i>          | Bacteria      | BN948_05072<br>BN948_05073 | AAK84297 ( <i>pcaH2</i> )<br>AAK84298 ( <i>pcaG2</i> ) | [32]      |
| <i>pdC</i>        | <i>p</i> -coumaric acid decarboxylase                                                 | <i>Lactobacillus plantarum</i>            | Bacteria      | LPU63827                   | AAC45282                                               | [33]      |
| <i>PFOMT</i>      | phenylpropanoid/flavonoid <i>O</i> -methyltransferase                                 | <i>Mesembryanthemum crystallinum</i>      | Viridiplantae | –                          | AAN61072                                               | [34]      |
| <i>PKS1</i>       | <i>p</i> -coumaroyl-diketide-CoA synthase                                             | <i>Wachendorfia thyrsoiflora</i>          | Viridiplantae | –                          | AAW50921                                               | [35]      |
| <i>RAS</i>        | rosmarinic acid synthase                                                              | <i>Melissa officinalis</i>                | Viridiplantae | –                          | CBW35684                                               | [36]      |
| <i>rpaI</i>       | acyl-homoserine lactone synthases                                                     | <i>Rhodopseudomonas palustris</i> CGA009  | Bacteria      | RPA0320                    | CAE25764                                               | [37]      |
| <i>SDT</i>        | spermidine disinapoyl acyltransferase                                                 | <i>Arabidopsis thaliana</i>               | Viridiplantae | AT2G23510                  | AEC07460                                               | [38]      |
| <i>slr0095</i>    | caffeoyl-CoA <i>O</i> -methyltransferase                                              | <i>Synechocystis</i> sp. PCC 6803         | Bacteria      | SYNGTS_2605                | BAK51353                                               | [39]      |
| <i>SNG1</i>       | sinapoylglucose:malic acid <i>O</i> -sinapoyltransferase                              | <i>Arabidopsis thaliana</i>               | Viridiplantae | AT2G22990                  | AEC07390                                               | [40]      |
| <i>SPC4</i>       | cationic peroxidase                                                                   | <i>Sorghum bicolor</i>                    | Viridiplantae | LOC8074114                 | EES02106                                               | [41]      |
| <i>STS2</i>       | resveratrol synthase                                                                  | <i>Vitis vinifera</i>                     | Viridiplantae | VIT_00010554001            | ABC84860                                               | [42]      |
| <i>THT10</i>      | tyramine hydroxycinnamoyltransferase                                                  | <i>Nicotiana tabacum</i>                  | Viridiplantae | LOC107822189               | CAB55502                                               | [43]      |
| <i>tyrB</i>       | tyrosine aminotransferase                                                             | <i>Escherichia coli</i> K-12              | Bacteria      | b4054                      | NP_418478                                              | [44]      |
| <i>UGT72E1</i>    | coniferaldehyde UDP-glucosyl transferase                                              | <i>Arabidopsis thaliana col</i>           | Viridiplantae | AT3G50740                  | AEE78703                                               | [45]      |
| <i>UGT84A2</i>    | sinapic acid-1-glucosyltransferase                                                    | <i>Arabidopsis thaliana</i>               | Viridiplantae | AT3G21560                  | AEE76523                                               | [46]      |
| <i>VpVAN</i>      | vanillin synthase                                                                     | <i>Vanilla planifolia</i>                 | Viridiplantae | –                          | AKG47593                                               | [47]      |
| <i>ydiB</i>       | quinic acid/shikimic acid 5-dehydrogenase                                             | <i>Escherichia coli</i> K-12              | Bacteria      | b1692                      | NP_416207                                              | [48]      |

**Table S2.** Summary of enzyme properties for the conversion of metabolites in the shikimate, general phenylpropanoid, flavonoid, or monolignol biosynthetic pathways.

Reaction scheme, coenzyme requirement, enzyme activity (kinetic parameters, specific activity, or substrate range), and reference(s) are shown.

|                                  |                                                                                                                                                                                                                                              |
|----------------------------------|----------------------------------------------------------------------------------------------------------------------------------------------------------------------------------------------------------------------------------------------|
| Gene                             | <i>F5H</i>                                                                                                                                                                                                                                   |
| Enzyme                           | ferulic acid 5-hydroxylase                                                                                                                                                                                                                   |
| Reaction                         | <p>coniferaldehyde <math>\xrightarrow{\text{NADPH, H}^+, \text{O}_2}</math> 5-hydroxy-coniferaldehyde</p>                                                                                                                                    |
| Coenzyme                         | NADPH                                                                                                                                                                                                                                        |
| Kinetics<br>$V_{\max}$ and $K_m$ | coniferaldehyde, 5 $\text{pkat}\cdot\text{mg}^{-1}$ and 1 ( $\mu\text{M}$ )<br>coniferyl alcohol, 6 $\text{pkat}\cdot\text{mg}^{-1}$ and 3 ( $\mu\text{M}$ )<br>ferulic acid, 4 $\text{pkat}\cdot\text{mg}^{-1}$ and 1,000 ( $\mu\text{M}$ ) |
| Reference                        | [1]                                                                                                                                                                                                                                          |

|                                        |                                                                                                                                                                                                                                |
|----------------------------------------|--------------------------------------------------------------------------------------------------------------------------------------------------------------------------------------------------------------------------------|
| Gene                                   | <i>3AT2</i>                                                                                                                                                                                                                    |
| Enzyme                                 | anthocyanin acyltransferase                                                                                                                                                                                                    |
| Reaction                               | <p><i>p</i>-coumaroyl-CoA + cyanidin 3,5-diglucoside <math>\xrightarrow{\text{CoASH}}</math> cyanidin 3-O-(6-O-<i>p</i>-coumaroyl)glucoside-5-O-glucoside</p>                                                                  |
| Coenzyme                               | unnecessary                                                                                                                                                                                                                    |
| Kinetics<br>$k_{\text{cat}}$ and $K_m$ | <i>p</i> -coumaroyl-CoA, 6.9 $\text{sec}^{-1}$ and 6.6 $\mu\text{M}$<br>feruloyl-CoA, 7.7 $\text{sec}^{-1}$ and 9.4 $\mu\text{M}$<br>caffeoyl-CoA, 8.5 $\text{sec}^{-1}$ and 4.9 $\mu\text{M}$<br>sinapoyl-CoA, not determined |
| Reference                              | [2]                                                                                                                                                                                                                            |

|                                |                                                                                                                                                                                                                                                                                             |
|--------------------------------|---------------------------------------------------------------------------------------------------------------------------------------------------------------------------------------------------------------------------------------------------------------------------------------------|
| Gene                           | <i>ACT</i>                                                                                                                                                                                                                                                                                  |
| Enzyme                         | agmatine coumaroyltransferase                                                                                                                                                                                                                                                               |
| Reaction                       | <p><i>p</i>-coumaroyl-CoA + agmatine <math>\xrightarrow{\text{CoASH}}</math> <i>p</i>-hydroxycinnamoylagmatine</p>                                                                                                                                                                          |
| Coenzyme                       | unnecessary                                                                                                                                                                                                                                                                                 |
| Specific activity<br>and $K_m$ | <i>p</i> -coumaroyl-CoA, 9.9 $\text{kat}\cdot\text{M}^{-1}\cdot\text{g}^{-1}$ and 1.0 $\mu\text{M}$<br>feruloyl-CoA, 1.4 $\text{kat}\cdot\text{M}^{-1}\cdot\text{g}^{-1}$ and 6.1 $\mu\text{M}$<br>caffeoyl-CoA, 5.9 $\text{kat}\cdot\text{M}^{-1}\cdot\text{g}^{-1}$ and 5.8 $\mu\text{M}$ |
| Reference                      | [3]                                                                                                                                                                                                                                                                                         |

|                                        |                                                                                                                                                                                                                                                                             |
|----------------------------------------|-----------------------------------------------------------------------------------------------------------------------------------------------------------------------------------------------------------------------------------------------------------------------------|
| Gene                                   | <i>AT208</i>                                                                                                                                                                                                                                                                |
| Enzyme                                 | anthocyanidin 3- <i>O</i> -glucoside 6'- <i>O</i> -acyltransferase                                                                                                                                                                                                          |
| Reaction                               | 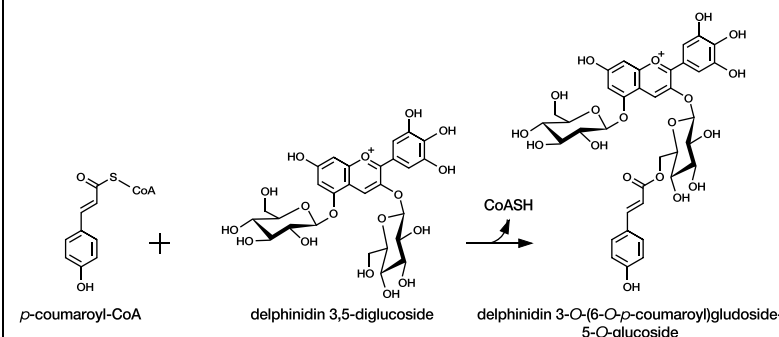 <p><i>p</i>-coumaroyl-CoA + delphinidin 3,5-diglucoside <math>\xrightarrow{\text{CoASH}}</math> delphinidin 3-<i>O</i>-(6-<i>O</i>-<i>p</i>-coumaroyl)glucoside-5-<i>O</i>-glucoside</p> |
| Coenzyme                               | unnecessary                                                                                                                                                                                                                                                                 |
| Kinetics<br>$V_{\text{max}}$ and $K_m$ | <i>p</i> -coumaroyl-CoA, 138 nkat·mg <sup>-1</sup> and 24 μM<br>caffeoyl-CoA, 168 nkat·mg <sup>-1</sup> and 45 μM                                                                                                                                                           |
| Reference                              | [49]                                                                                                                                                                                                                                                                        |

|                 |                                                                                                                                                                                                   |
|-----------------|---------------------------------------------------------------------------------------------------------------------------------------------------------------------------------------------------|
| Gene            | <i>Atu1417</i>                                                                                                                                                                                    |
| Enzyme          | enoyl-CoA hydratase                                                                                                                                                                               |
| Reaction        | 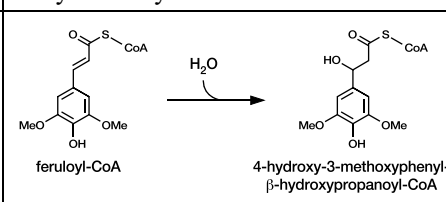 <p>feruloyl-CoA + H<sub>2</sub>O <math>\rightarrow</math> 4-hydroxy-3-methoxyphenyl-β-hydroxypropanoyl-CoA</p> |
| Coenzyme        | unnecessary                                                                                                                                                                                       |
| Substrate range | feruloyl-CoA, <i>p</i> -coumaroyl-CoA, caffeoyl-CoA                                                                                                                                               |
| Reference       | [5]                                                                                                                                                                                               |

|                   |                                                                                                                                                                              |
|-------------------|------------------------------------------------------------------------------------------------------------------------------------------------------------------------------|
| Gene              | <i>Balat_0669</i>                                                                                                                                                            |
| Enzyme            | chlorogenic acid esterase                                                                                                                                                    |
| Reaction          | 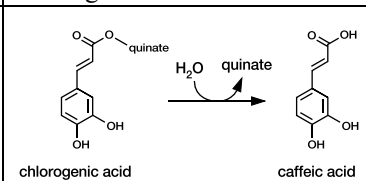 <p>chlorogenic acid + H<sub>2</sub>O <math>\rightarrow</math> caffeic acid + quinate</p> |
| Coenzyme          | unnecessary                                                                                                                                                                  |
| Specific activity | chlorogenic acid, 2.5 μmol·min <sup>-1</sup> ·mg <sup>-1</sup>                                                                                                               |
| Reference         | [6]                                                                                                                                                                          |

|                 |                                                                                                                                                                                                         |
|-----------------|---------------------------------------------------------------------------------------------------------------------------------------------------------------------------------------------------------|
| Gene            | <i>BrRCD</i>                                                                                                                                                                                            |
| Enzyme          | caffeic acid 4,5-dioxygenase                                                                                                                                                                            |
| Reaction        | 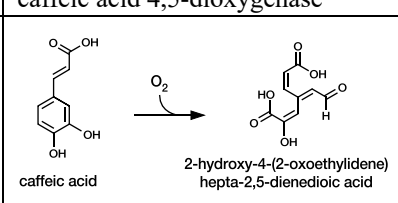 <p>caffeic acid + O<sub>2</sub> <math>\rightarrow</math> 2-hydroxy-4-(2-oxoethylidene)hepta-2,5-dienedioic acid</p> |
| Coenzyme        | unnecessary                                                                                                                                                                                             |
| Substrate range | caffeic acid, homoprotocatechuic acid, protocatechuic acid, catechol                                                                                                                                    |
| Reference       | [7]                                                                                                                                                                                                     |

|                                 |                                                                                                                                               |
|---------------------------------|-----------------------------------------------------------------------------------------------------------------------------------------------|
| Gene                            | <i>C2H</i>                                                                                                                                    |
| Enzyme                          | <i>p</i> -coumaroyl 2'-hydroxylase                                                                                                            |
| Reaction                        | <p><i>p</i>-coumaroyl-CoA + 2-oxoglutaric acid <math>\xrightarrow{O_2}</math> 2,4-dihydroxycinnamoyl-CoA + succinic acid + CO<sub>2</sub></p> |
| Coenzyme                        | ascorbate                                                                                                                                     |
| Kinetics<br>$k_{cat}$ and $K_m$ | <i>p</i> -coumaroyl-CoA, 0.64 sec <sup>-1</sup> and 15.25 μM<br>feruloyl-CoA, 0.55 sec <sup>-1</sup> and 14.06 μM                             |
| Reference                       | [8]                                                                                                                                           |

|                                 |                                                                                                                                          |
|---------------------------------|------------------------------------------------------------------------------------------------------------------------------------------|
| Gene                            | <i>CA9OMT</i>                                                                                                                            |
| Enzyme                          | coniferyl alcohol 9- <i>O</i> -methyltransferase                                                                                         |
| Reaction                        | <p>coniferyl alcohol + S-adenosyl-L-methionine <math>\rightarrow</math> coniferyl alcohol 9-methyl ether + S-adenosyl-L-homocysteine</p> |
| Coenzyme                        | unnecessary                                                                                                                              |
| Kinetics<br>$k_{cat}$ and $K_m$ | coniferyl alcohol, 0.029 sec <sup>-1</sup> and 7.23 μM                                                                                   |
| Reference                       | [9]                                                                                                                                      |

|                                 |                                                                                                                                     |
|---------------------------------|-------------------------------------------------------------------------------------------------------------------------------------|
| Gene                            | <i>CADH</i>                                                                                                                         |
| Enzyme                          | coniferyl alcohol dehydrogenase                                                                                                     |
| Reaction                        | <p>coniferyl alcohol + NAD<sup>+</sup> + H<sub>2</sub>O <math>\xrightarrow{\quad}</math> coniferaldehyde + NADH + H<sup>+</sup></p> |
| Coenzyme                        | NAD <sup>+</sup>                                                                                                                    |
| Kinetics<br>$k_{cat}$ and $K_m$ | coniferyl alcohol, 69.7 sec <sup>-1</sup> and 130 μM<br>coniferyl alcohol, 116 sec <sup>-1</sup> and 1700 μM                        |
| Reference                       | [10, 50]                                                                                                                            |

|                 |                                                                                   |
|-----------------|-----------------------------------------------------------------------------------|
| Gene            | <i>CALipB</i>                                                                     |
| Enzyme          | lipase B                                                                          |
| Reaction        | <p>ferulic acid + glycerol <math>\xrightarrow{-H_2O}</math> feruloyl glycerol</p> |
| Coenzyme        | unnecessary                                                                       |
| Substrate range | ferulic acid, <i>p</i> -coumaric acid, caffeic acid                               |
| Reference       | [51, 52]                                                                          |

|           |                                                                                                                                |
|-----------|--------------------------------------------------------------------------------------------------------------------------------|
| Gene      | <i>calA</i>                                                                                                                    |
| Enzyme    | coniferyl alcohol dehydrogenase                                                                                                |
| Reaction  | <p>coniferyl alcohol <math>\xrightarrow{\text{NAD}^+, \text{H}_2\text{O}}^{\text{NADH}, \text{H}^+}</math> coniferaldehyde</p> |
| Coenzyme  | NAD <sup>+</sup>                                                                                                               |
| Substrate | Only reported for coniferyl alcohol                                                                                            |
| Reference | [12]                                                                                                                           |

|                             |                                                                                                                                                                                 |
|-----------------------------|---------------------------------------------------------------------------------------------------------------------------------------------------------------------------------|
| Gene                        | <i>calB</i>                                                                                                                                                                     |
| Enzyme                      | coniferyl aldehyde dehydrogenase                                                                                                                                                |
| Reaction                    | <p>coniferaldehyde <math>\xrightarrow{\text{NAD}^+, \text{H}_2\text{O}}^{\text{NADH}, \text{H}^+}</math> ferulic acid</p>                                                       |
| Coenzyme                    | NAD <sup>+</sup>                                                                                                                                                                |
| Specific activity and $K_m$ | coniferaldehyde, 36.5 $\mu\text{mol}\cdot\text{min}^{-1}\cdot\text{g}^{-1}$ and 7–12 $\mu\text{M}$<br>sinapaldehyde, 28.1 $\mu\text{mol}\cdot\text{min}^{-1}\cdot\text{g}^{-1}$ |
| Reference                   | [13]                                                                                                                                                                            |

|                                     |                                                                                                                                                                                                          |
|-------------------------------------|----------------------------------------------------------------------------------------------------------------------------------------------------------------------------------------------------------|
| Gene                                | <i>CASHT</i>                                                                                                                                                                                             |
| Enzyme                              | hydroxycinnamoyl-CoA: serotonin <i>N</i> -(hydroxycinnamoyl)transferase                                                                                                                                  |
| Reaction                            | <p><i>p</i>-coumaroyl-CoA + serotonin <math>\xrightarrow{\text{CoASH}}</math> <i>p</i>-coumaroylserotonin</p>                                                                                            |
| Coenzyme                            | unnecessary                                                                                                                                                                                              |
| Kinetics $V_{\text{max}}$ and $K_m$ | <i>p</i> -coumaroyl-CoA, 35 nkat·mg <sup>-1</sup> and 23.2 $\mu\text{M}$<br>feruloyl-CoA, 7 nkat·mg <sup>-1</sup> and 3.5 $\mu\text{M}$<br>caffeoyl-CoA, 31 nkat·mg <sup>-1</sup> and 12.7 $\mu\text{M}$ |
| Reference                           | [14, 53]                                                                                                                                                                                                 |

|                                     |                                                                                                                                       |
|-------------------------------------|---------------------------------------------------------------------------------------------------------------------------------------|
| Gene                                | <i>CCMT1</i>                                                                                                                          |
| Enzyme                              | cinnamic acid/ <i>p</i> -coumaric acid carboxyl methyltransferase                                                                     |
| Reaction                            | <p>cinnamic acid + S-adenosyl-L-methionine <math>\longrightarrow</math> methylcinnamate + S-adenosyl-L-homocysteine</p>               |
| Coenzyme                            | unnecessary                                                                                                                           |
| Kinetics $k_{\text{cat}}$ and $K_m$ | cinnamic acid, 0.188 sec <sup>-1</sup> and 124 $\mu\text{M}$<br><i>p</i> -coumaric acid, 116 sec <sup>-1</sup> and 70.4 $\mu\text{M}$ |
| Reference                           | [15]                                                                                                                                  |

|                                  |                                                                                                                    |
|----------------------------------|--------------------------------------------------------------------------------------------------------------------|
| Gene                             | <i>CGT</i>                                                                                                         |
| Enzyme                           | chlorogenic acid: glucaric acid caffeoyltransferase                                                                |
| Reaction                         | <p>caffeoyl-D-quininate + D-glucarate → caffeoylglucarate + L-quininate</p>                                        |
| Coenzyme                         | unnecessary                                                                                                        |
| Kinetics<br>$V_{\max}$ and $K_m$ | D-glucaric acid, 624 nkat·mg <sup>-1</sup> and 400 μM<br>D-galactaric acid, 310 nkat·mg <sup>-1</sup> and 1,700 μM |
| Reference                        | [16, 54]                                                                                                           |

|                 |                                                                                                 |
|-----------------|-------------------------------------------------------------------------------------------------|
| Gene            | <i>CHS5</i>                                                                                     |
| Enzyme          | chalcone synthase                                                                               |
| Reaction        | <p><i>p</i>-coumaroyl-CoA + 3 malonyl-CoA → naringenin chalcone + 4 CoASH, 3 CO<sub>2</sub></p> |
| Coenzyme        | unnecessary                                                                                     |
| Substrate range | <i>p</i> -coumaroyl-CoA, caffeoyl-CoA, feruloyl-CoA                                             |
| Reference       | [17, 55]                                                                                        |

|                 |                                                                                                                                         |
|-----------------|-----------------------------------------------------------------------------------------------------------------------------------------|
| Gene            | <i>couA</i>                                                                                                                             |
| Enzyme          | hydroxycinnamoyl-CoA hydratase-lyase                                                                                                    |
| Reaction        | <p><i>p</i>-coumaroyl-CoA + H<sub>2</sub>O → 3-(4-hydroxyphenyl)-3-hydroxypropionyl-CoA → <i>p</i>-hydroxybenzaldehyde + acetyl-CoA</p> |
| Coenzyme        | unnecessary                                                                                                                             |
| Substrate range | <i>p</i> -coumaroyl-CoA, caffeoyl-CoA, feruloyl-CoA                                                                                     |
| Reference       | [18]                                                                                                                                    |

|                                        |                                                                                                                                                                                                                                                                 |
|----------------------------------------|-----------------------------------------------------------------------------------------------------------------------------------------------------------------------------------------------------------------------------------------------------------------|
| Gene                                   | <i>CURS3</i>                                                                                                                                                                                                                                                    |
| Enzyme                                 | curcumin synthase                                                                                                                                                                                                                                               |
| Reaction                               | <p><i>p</i>-coumaroyl-CoA + <i>p</i>-coumaroyldiketide-CoA → bisdemethoxycurcumin + 2 CoASH, CO<sub>2</sub></p>                                                                                                                                                 |
| Coenzyme                               | unnecessary                                                                                                                                                                                                                                                     |
| Kinetics<br>$k_{\text{cat}}$ and $K_m$ | <i>p</i> -coumaroyl-CoA, 0.006 sec <sup>-1</sup> and 3.4 μM<br>( <i>p</i> -coumaroyl-CoA + cinnamoyldiketide- <i>N</i> -acetylcysteamine)<br>feruloyl-CoA, 0.003 sec <sup>-1</sup> and 2.2 μM<br>(feruloyl-CoA + cinnamoyldiketide- <i>N</i> -acetylcysteamine) |
| Reference                              | [19]                                                                                                                                                                                                                                                            |

|                                  |                                                                                                                                  |
|----------------------------------|----------------------------------------------------------------------------------------------------------------------------------|
| Gene                             | <i>CYP84A4</i>                                                                                                                   |
| Enzyme                           | <i>p</i> -coumaraldehyde 3-hydroxylase                                                                                           |
| Reaction                         | 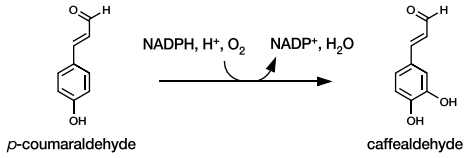 <p><i>p</i>-coumaraldehyde → caffealdehyde</p> |
| Coenzyme                         | NADPH                                                                                                                            |
| Kinetics<br>$V_{\max}$ and $K_m$ | <i>p</i> -coumaraldehyde, 0.69 $\mu\text{kat}\cdot\text{mg}^{-1}$ and 41 $\mu\text{M}$                                           |
| Reference                        | [20]                                                                                                                             |

|                                        |                                                                                                                                                                                    |
|----------------------------------------|------------------------------------------------------------------------------------------------------------------------------------------------------------------------------------|
| Gene                                   | <i>CYP98A22</i>                                                                                                                                                                    |
| Enzyme                                 | <i>p</i> -coumaroyl 2'-hydroxylase                                                                                                                                                 |
| Reaction                               | 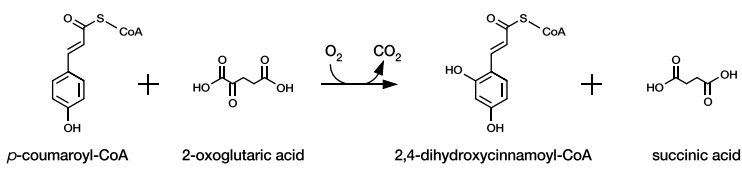 <p><i>p</i>-coumaroyl-CoA + 2-oxoglutaric acid → 2,4-dihydroxycinnamoyl-CoA + succinic acid</p> |
| Coenzyme                               | ascorbate                                                                                                                                                                          |
| Kinetics<br>$k_{\text{cat}}$ and $K_m$ | <i>p</i> -coumaroyl-CoA, 0.71 $\text{sec}^{-1}$ and 50 $\mu\text{M}$<br>feruloyl-CoA, 0.46 $\text{sec}^{-1}$ and 37 $\mu\text{M}$                                                  |
| Reference                              | [21]                                                                                                                                                                               |

|                                        |                                                                                                                                                                        |
|----------------------------------------|------------------------------------------------------------------------------------------------------------------------------------------------------------------------|
| Gene                                   | <i>F6H1</i>                                                                                                                                                            |
| Enzyme                                 | feruloyl-CoA 6'-hydroxylase                                                                                                                                            |
| Reaction                               | 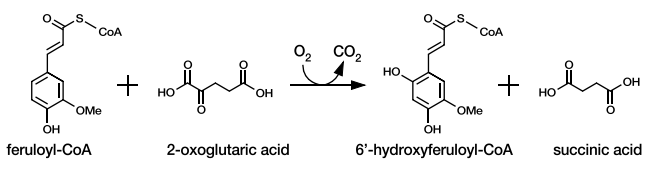 <p>feruloyl-CoA + 2-oxoglutaric acid → 6'-hydroxyferuloyl-CoA + succinic acid</p> |
| Cofactor                               | ascorbate                                                                                                                                                              |
| Kinetics<br>$k_{\text{cat}}$ and $K_m$ | feruloyl-CoA, 11.0 $\text{sec}^{-1}$ and 36 $\mu\text{M}$<br><i>p</i> -coumaroyl-CoA, trace reaction                                                                   |
| Reference                              | [22]                                                                                                                                                                   |

|                                        |                                                                                                                                                                                                 |
|----------------------------------------|-------------------------------------------------------------------------------------------------------------------------------------------------------------------------------------------------|
| Gene                                   | <i>FDC1</i>                                                                                                                                                                                     |
| Enzyme                                 | phenacrylic acid decarboxylase                                                                                                                                                                  |
| Reaction                               | 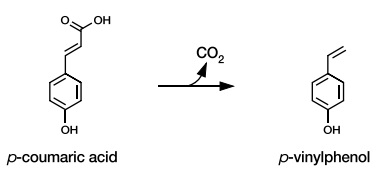 <p><i>p</i>-coumaric acid → <i>p</i>-vinylphenol</p>                                                        |
| Cofactor                               | prenylated FMNH <sub>2</sub>                                                                                                                                                                    |
| Kinetics<br>$k_{\text{cat}}$ and $K_m$ | <i>p</i> -coumaric acid, 1.5 $\text{sec}^{-1}$ and 110 $\mu\text{M}$<br>cinnamic acid, 4.6 $\text{sec}^{-1}$ and 180 $\mu\text{M}$<br>ferulic acid, 3.8 $\text{sec}^{-1}$ and 180 $\mu\text{M}$ |
| Reference                              | [56]                                                                                                                                                                                            |

|                                  |                                                                                                                                                                               |
|----------------------------------|-------------------------------------------------------------------------------------------------------------------------------------------------------------------------------|
| Gene                             | <i>HCALDH</i>                                                                                                                                                                 |
| Enzyme                           | hydroxycinnamaldehyde dehydrogenase                                                                                                                                           |
| Reaction                         | <p>sinapaldehyde → sinapic acid</p>                                                                                                                                           |
| Coenzyme                         | NADP <sup>+</sup>                                                                                                                                                             |
| Kinetics<br>$V_{\max}$ and $K_m$ | coniferaldehyde, 560 pkat·mg <sup>-1</sup> and 43 μM<br>sinapaldehyde, 1700 pkat·mg <sup>-1</sup> and 150 μM<br><i>p</i> -coumaraldehyde, 310 pkat·mg <sup>-1</sup> and 19 μM |
| Reference                        | [57]                                                                                                                                                                          |

|                 |                                                                                        |
|-----------------|----------------------------------------------------------------------------------------|
| Gene            | <i>HCBT</i>                                                                            |
| Enzyme          | anthranilic acid <i>N</i> -hydroxycinnamoyl/benzoyltransferase                         |
| Reaction        | <p><i>p</i>-coumaroyl-CoA + anthranilic acid → <i>p</i>-coumaroyl-anthranilic acid</p> |
| Coenzyme        | unnecessary                                                                            |
| Substrate range | <i>p</i> -coumaroyl-CoA, caffeoyl-CoA, feruloyl-CoA, sinapoyl-CoA                      |
| Reference       | [25, 58]                                                                               |

|                   |                                                                                              |
|-------------------|----------------------------------------------------------------------------------------------|
| Gene              | <i>HCT2</i>                                                                                  |
| Enzyme            | malic acid <i>O</i> -hydroxycinnamoyl transferase                                            |
| Reaction          | <p><i>p</i>-coumaroyl-CoA + malic acid → <i>p</i>-coumaroyl-malic acid</p>                   |
| Coenzyme          | unnecessary                                                                                  |
| Specific activity | <i>p</i> -coumaroyl-CoA, 34 nkat·mg <sup>-1</sup><br>caffeoyl-CoA, 5.1 nkat·mg <sup>-1</sup> |
| Reference         | [26]                                                                                         |

|                                        |                                                                                                                    |
|----------------------------------------|--------------------------------------------------------------------------------------------------------------------|
| Gene                                   | <i>HHT1</i>                                                                                                        |
| Enzyme                                 | omega-hydroxypalmitic acid <i>O</i> -feruloyl transferase                                                          |
| Reaction                               | <p><i>p</i>-coumaroyl-CoA + 16-hydroxypalmitic acid → 16-<i>p</i>-coumaroyloxy palmitic acid</p>                   |
| Coenzyme                               | unnecessary                                                                                                        |
| Kinetics<br>$k_{\text{cat}}$ and $K_m$ | <i>p</i> -coumaroyl-CoA, 0.0136 sec <sup>-1</sup> and 36.7 μM<br>feruloyl-CoA, 0.0173 sec <sup>-1</sup> and 9.7 μM |
| Reference                              | [27]                                                                                                               |



|                 |                                                                                                                                                                                                                                                                                                                           |
|-----------------|---------------------------------------------------------------------------------------------------------------------------------------------------------------------------------------------------------------------------------------------------------------------------------------------------------------------------|
| Gene            | <i>ligL</i>                                                                                                                                                                                                                                                                                                               |
| Enzyme          | $\beta$ -aryl ether C $\alpha$ -dehydrogenase                                                                                                                                                                                                                                                                             |
| Reaction        | 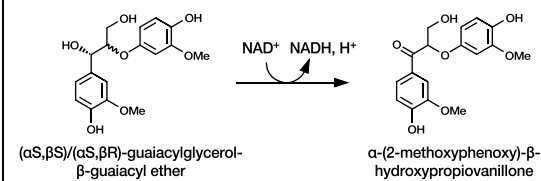 <p>(<math>\alpha</math>S,<math>\beta</math>S)/(<math>\alpha</math>S,<math>\beta</math>R)-guaiacylglycerol-<math>\beta</math>-guaiacyl ether</p> <p><math>\alpha</math>-(2-methoxyphenoxy)-<math>\beta</math>-hydroxypropiovanillone</p> |
| Coenzyme        | NAD <sup>+</sup>                                                                                                                                                                                                                                                                                                          |
| Substrate range | $\beta$ -O-4 dimers and oligomers with guaiacyl and syringyl structure                                                                                                                                                                                                                                                    |
| Reference       | [28, 59]                                                                                                                                                                                                                                                                                                                  |

|                                                               |                                                                                                                                                                                  |
|---------------------------------------------------------------|----------------------------------------------------------------------------------------------------------------------------------------------------------------------------------|
| Gene                                                          | <i>OsHCT4</i>                                                                                                                                                                    |
| Enzyme                                                        | glycerol <i>O</i> -hydroxycinnamoyltransferase                                                                                                                                   |
| Reaction                                                      | 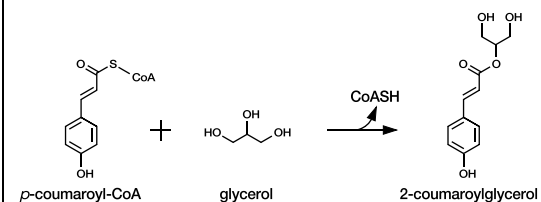 <p><i>p</i>-coumaroyl-CoA</p> <p>glycerol</p> <p>2-coumaroylglycerol</p>                       |
| Coenzyme                                                      | unnecessary                                                                                                                                                                      |
| Kinetics<br><i>k</i> <sub>cat</sub> and <i>K</i> <sub>m</sub> | <i>p</i> -coumaroyl-CoA, 0.037 sec <sup>-1</sup> and 60 $\mu$ M<br>feruloyl-CoA, 0.071 sec <sup>-1</sup> and 72 $\mu$ M<br>caffeoyl-CoA, 0.082 sec <sup>-1</sup> and 102 $\mu$ M |
| Reference                                                     | [29]                                                                                                                                                                             |

|                                                               |                                                                                                                                                                                                                                                                     |
|---------------------------------------------------------------|---------------------------------------------------------------------------------------------------------------------------------------------------------------------------------------------------------------------------------------------------------------------|
| Gene                                                          | <i>padC</i>                                                                                                                                                                                                                                                         |
| Enzyme                                                        | phenolic acid decarboxylase                                                                                                                                                                                                                                         |
| Reaction                                                      | 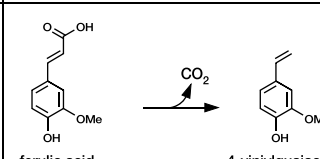 <p>ferulic acid</p> <p>4-vinylguaiacol</p>                                                                                                                                      |
| Coenzyme                                                      | prenylated FMNH <sub>2</sub> ?                                                                                                                                                                                                                                      |
| Kinetics<br><i>V</i> <sub>max</sub> and <i>K</i> <sub>m</sub> | ferulic acid, 280 $\mu$ mol·min <sup>-1</sup> ·mg <sup>-1</sup> and 1100 $\mu$ M<br><i>p</i> -coumaric acid, 265 $\mu$ mol·min <sup>-1</sup> ·mg <sup>-1</sup> and 1300 $\mu$ M<br>caffeic acid, 180 $\mu$ mol·min <sup>-1</sup> ·mg <sup>-1</sup> and 2600 $\mu$ M |
| Reference                                                     | [30]                                                                                                                                                                                                                                                                |

|                 |                                                                                                                                                                 |
|-----------------|-----------------------------------------------------------------------------------------------------------------------------------------------------------------|
| Gene            | <i>pcaG</i> + <i>pcaH</i>                                                                                                                                       |
| Enzyme          | protocatechuic acid 3,4-dioxygenase                                                                                                                             |
| Reaction        | 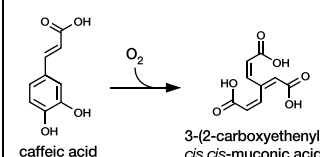 <p>caffeic acid</p> <p>3-(2-carboxyethenyl)-<i>cis,cis</i>-muconic acid</p> |
| Coenzyme        | unnecessary                                                                                                                                                     |
| Substrate range | caffeic acid and dihydrocaffeic acid                                                                                                                            |
| Reference       | [31]                                                                                                                                                            |

|                 |                                                                                                                                                                    |
|-----------------|--------------------------------------------------------------------------------------------------------------------------------------------------------------------|
| Gene            | <i>pcaG2 + pcaH2</i>                                                                                                                                               |
| Enzyme          | protocatechuic acid 3,4-dioxygenase                                                                                                                                |
| Reaction        | 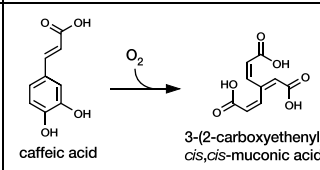 <p>caffeic acid</p> <p>3-(2-carboxyethenyl)-<br/><i>cis,cis</i>-muconic acid</p> |
| Coenzyme        | unnecessary                                                                                                                                                        |
| Substrate range | caffeic acid and 3,4-dihydroxyphenylacetic acid                                                                                                                    |
| Reference       | [32]                                                                                                                                                               |

|                                                               |                                                                                                                                             |
|---------------------------------------------------------------|---------------------------------------------------------------------------------------------------------------------------------------------|
| Gene                                                          | <i>pdc</i>                                                                                                                                  |
| Enzyme                                                        | <i>p</i> -coumaric acid decarboxylase                                                                                                       |
| Reaction                                                      | 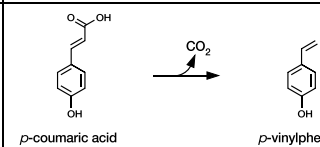 <p><i>p</i>-coumaric acid</p> <p><i>p</i>-vinylphenol</p> |
| Coenzyme                                                      | prenylated FMNH <sub>2</sub>                                                                                                                |
| Kinetics<br><i>V</i> <sub>max</sub> and <i>K</i> <sub>m</sub> | <i>p</i> -coumaric acid, 766 μmol·min <sup>-1</sup> ·mg <sup>-1</sup> and 1400 μM                                                           |
| Reference                                                     | [33]                                                                                                                                        |

|                                                               |                                                                                                                                                                                                                                                                                                                                  |
|---------------------------------------------------------------|----------------------------------------------------------------------------------------------------------------------------------------------------------------------------------------------------------------------------------------------------------------------------------------------------------------------------------|
| Gene                                                          | <i>PFOMT</i>                                                                                                                                                                                                                                                                                                                     |
| Enzyme                                                        | phenylpropanoid/flavonoid <i>O</i> -methyltransferase                                                                                                                                                                                                                                                                            |
| Reaction                                                      | 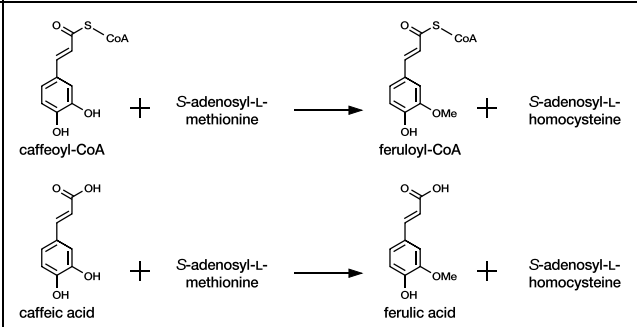 <p>caffeoyl-CoA</p> <p><i>S</i>-adenosyl-L-methionine</p> <p>feruloyl-CoA</p> <p><i>S</i>-adenosyl-L-homocysteine</p> <p>caffeic acid</p> <p><i>S</i>-adenosyl-L-methionine</p> <p>ferulic acid</p> <p><i>S</i>-adenosyl-L-homocysteine</p> |
| Coenzyme                                                      | unnecessary                                                                                                                                                                                                                                                                                                                      |
| Kinetics<br><i>V</i> <sub>max</sub> and <i>K</i> <sub>m</sub> | caffeoyl-CoA, 0.025 μmol·min <sup>-1</sup> ·mg <sup>-1</sup> and 25 μM<br>caffeic acid, 0.005 μmol·min <sup>-1</sup> ·mg <sup>-1</sup> and 44 μM<br>quercetin, 0.034 μmol·min <sup>-1</sup> ·mg <sup>-1</sup> and 6.4 μM                                                                                                         |
| Reference                                                     | [34]                                                                                                                                                                                                                                                                                                                             |

|                                                               |                                                                                                                                                                                                        |
|---------------------------------------------------------------|--------------------------------------------------------------------------------------------------------------------------------------------------------------------------------------------------------|
| Gene                                                          | <i>PKS1</i>                                                                                                                                                                                            |
| Enzyme                                                        | <i>p</i> -coumaroyl-diketide-CoA synthase                                                                                                                                                              |
| Reaction                                                      | 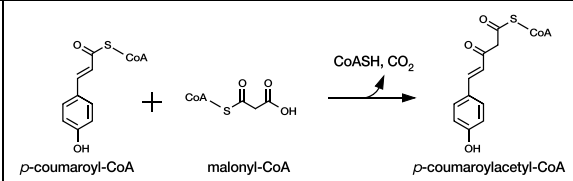 <p><i>p</i>-coumaroyl-CoA</p> <p>malonyl-CoA</p> <p>CoASH, CO<sub>2</sub></p> <p><i>p</i>-coumaroylacetyl-CoA</p> |
| Coenzyme                                                      | unnecessary                                                                                                                                                                                            |
| Kinetics<br><i>k</i> <sub>cat</sub> and <i>K</i> <sub>m</sub> | <i>p</i> -coumaroyl-CoA, 0.00048sec <sup>-1</sup> and 85 μM<br>phenylpropionyl-CoA, 0.0025 sec <sup>-1</sup> and 40 μM<br>cinnamoyl-CoA, 0.00053 sec <sup>-1</sup> and 28 μM                           |
| Reference                                                     | [35]                                                                                                                                                                                                   |

|                                 |                                                                                                                                                                                                                                                                                                                                                                                               |
|---------------------------------|-----------------------------------------------------------------------------------------------------------------------------------------------------------------------------------------------------------------------------------------------------------------------------------------------------------------------------------------------------------------------------------------------|
| Gene                            | <i>RAS</i>                                                                                                                                                                                                                                                                                                                                                                                    |
| Enzyme                          | rosmarinic acid synthase                                                                                                                                                                                                                                                                                                                                                                      |
| Reaction                        | 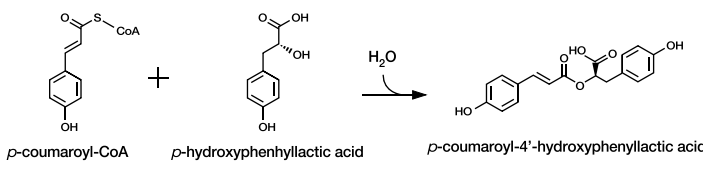 <p><i>p</i>-coumaroyl-CoA + <i>p</i>-hydroxyphenyllactic acid <math>\xrightarrow{-H_2O}</math> <i>p</i>-coumaroyl-4'-hydroxyphenyllactic acid</p>                                                                                                                                                          |
| Coenzyme                        | unnecessary                                                                                                                                                                                                                                                                                                                                                                                   |
| Kinetics<br>$V_{max}$ and $K_m$ | <i>p</i> -coumaroyl-CoA (+ <i>p</i> -hydroxyphenyllactic acid), 1076 pkat·mg <sup>-1</sup> and 9.4 μM<br><i>p</i> -coumaroyl-CoA (+3,4-dihydroxyphenyllactic acid), 294 pkat·mg <sup>-1</sup> and 3.2 μM<br>caffeoyl-CoA (+ <i>p</i> -hydroxyphenyllactic acid), 283 pkat·mg <sup>-1</sup> and 2.3 μM<br>caffeoyl-CoA (+3,4-dihydroxyphenyllactic acid), 103 pkat·mg <sup>-1</sup> and 3.3 μM |
| Reference                       | [37]                                                                                                                                                                                                                                                                                                                                                                                          |

|           |                                                                                                                                                                                                                                       |
|-----------|---------------------------------------------------------------------------------------------------------------------------------------------------------------------------------------------------------------------------------------|
| Gene      | <i>rpal</i>                                                                                                                                                                                                                           |
| Enzyme    | acyl-homoserine lactone synthases                                                                                                                                                                                                     |
| Reaction  | 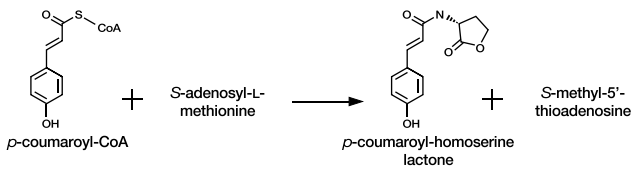 <p><i>p</i>-coumaroyl-CoA + S-adenosyl-L-methionine <math>\rightarrow</math> <i>p</i>-coumaroyl-homoserine lactone + S-methyl-5'-thioadenosine</p> |
| Coenzyme  | unnecessary                                                                                                                                                                                                                           |
| Reference | [36]                                                                                                                                                                                                                                  |

|                                 |                                                                                                                                                                                   |
|---------------------------------|-----------------------------------------------------------------------------------------------------------------------------------------------------------------------------------|
| Gene                            | <i>SDT</i>                                                                                                                                                                        |
| Enzyme                          | spermidine disinapoyl acyltransferase                                                                                                                                             |
| Reaction                        | 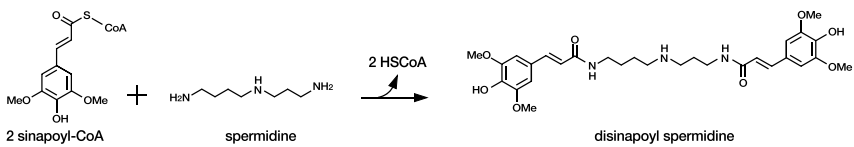 <p>2 sinapoyl-CoA + spermidine <math>\xrightarrow{-2 HSCoA}</math> disinapoyl spermidine</p> |
| Coenzyme                        | unnecessary                                                                                                                                                                       |
| Kinetics<br>$k_{cat}$ and $K_m$ | sinapoyl-CoA, 5.1 sec <sup>-1</sup> and 8.3 μM                                                                                                                                    |
| Reference                       | [38]                                                                                                                                                                              |

|                                 |                                                                                                                                                                                                                                                                        |
|---------------------------------|------------------------------------------------------------------------------------------------------------------------------------------------------------------------------------------------------------------------------------------------------------------------|
| Gene                            | <i>slr0095</i>                                                                                                                                                                                                                                                         |
| Enzyme                          | caffeoyl-CoA <i>O</i> -methyltransferase                                                                                                                                                                                                                               |
| Reaction                        | <p>3,4,5-trihydroxycinnamic acid + S-adenosyl-L-methionine → 5-hydroxyferulic acid + 3,5-dihydroxy-4-O-methoxycinnamic acid + 5-hydroxy-3,4-O-dimethoxycinnamic acid</p> <p>5-hydroxyferulic acid + S-adenosyl-L-methionine → sinapic acid</p>                         |
| Coenzyme                        | unnecessary                                                                                                                                                                                                                                                            |
| Kinetics<br>$k_{cat}$ and $K_m$ | 3,4,5-trihydroxycinnamic acid, 0.0104 liter·sec <sup>-1</sup> and 20.7 μM<br>caffeoyl-CoA, 0.0245 liter·sec <sup>-1</sup> and 32.9 μM<br>caffeic acid, 0.0055 liter·sec <sup>-1</sup> and 69.3 μM<br>5-hydroxyferulic acid, 0.0250 liter·sec <sup>-1</sup> and 74.0 μM |
| Reference                       | [39]                                                                                                                                                                                                                                                                   |

|                                 |                                                                            |
|---------------------------------|----------------------------------------------------------------------------|
| Gene                            | <i>SNG1</i>                                                                |
| Enzyme                          | sinapoylglucose:malic acid <i>O</i> -sinapoyltransferase                   |
| Reaction                        | <p>sinapoylglucose + malic acid → sinapoyl-malic acid + glucose</p>        |
| Coenzyme                        | unnecessary                                                                |
| Kinetics<br>$V_{max}$ and $K_m$ | sinapoylglucose, 0.528 μmol·min <sup>-1</sup> ·mg <sup>-1</sup> and 460 μM |
| Reference                       | [40]                                                                       |

|                             |                                                                                                                       |
|-----------------------------|-----------------------------------------------------------------------------------------------------------------------|
| Gene                        | <i>SPC4</i>                                                                                                           |
| Enzyme                      | cationic peroxidase                                                                                                   |
| Reaction                    | <p>ferulic acid + H<sub>2</sub>O<sub>2</sub> → ferulic acid radical + H<sub>2</sub>O</p>                              |
| Coenzyme                    | unnecessary                                                                                                           |
| Kinetics<br>$V_{max} / K_m$ | ferulic acid, 0.92 M <sup>-1</sup> ·s <sup>-1</sup><br><i>p</i> -coumaric acid, 0.23 M <sup>-1</sup> ·s <sup>-1</sup> |
| Reference                   | [41]                                                                                                                  |

|           |                                                                                                                                                                                                         |
|-----------|---------------------------------------------------------------------------------------------------------------------------------------------------------------------------------------------------------|
| Gene      | <i>STS2</i>                                                                                                                                                                                             |
| Enzyme    | resveratrol synthase                                                                                                                                                                                    |
| Reaction  | 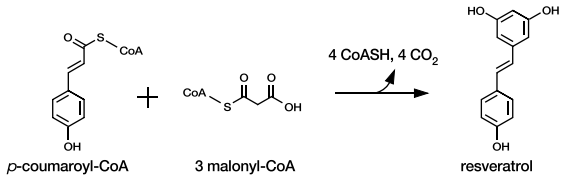 <p><i>p</i>-coumaroyl-CoA + 3 malonyl-CoA <math>\xrightarrow{4 \text{ CoASH}, 4 \text{ CO}_2}</math> resveratrol</p> |
| Coenzyme  | unnecessary                                                                                                                                                                                             |
| Reference | [42]                                                                                                                                                                                                    |

|                                  |                                                                                                                                                                                                                                       |
|----------------------------------|---------------------------------------------------------------------------------------------------------------------------------------------------------------------------------------------------------------------------------------|
| Gene                             | <i>THT10</i>                                                                                                                                                                                                                          |
| Enzyme                           | tyramine hydroxycinnamoyltransferase                                                                                                                                                                                                  |
| Reaction                         | 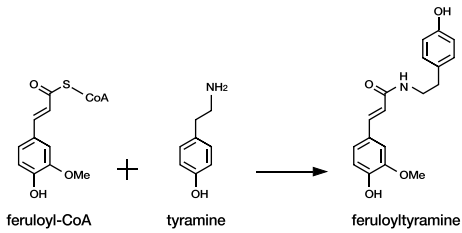 <p>feruloyl-CoA + tyramine <math>\rightarrow</math> feruloyltyramine</p>                                                                            |
| Coenzyme                         | unnecessary                                                                                                                                                                                                                           |
| Kinetics<br>$V_{\max}$ and $K_m$ | feruloyl-CoA, 69960 pkat·mg <sup>-1</sup> and 0.6 μM<br>sinapoyl-CoA, 76000 pkat·mg <sup>-1</sup> and 1 μM<br><i>p</i> -coumaroyl-CoA, 19200 pkat·mg <sup>-1</sup> and 2 μM<br>cinnamoyl-CoA, 120320 pkat·mg <sup>-1</sup> and 4.7 μM |
| Reference                        | [43]                                                                                                                                                                                                                                  |

|                                  |                                                                                                                                                                                        |
|----------------------------------|----------------------------------------------------------------------------------------------------------------------------------------------------------------------------------------|
| Gene                             | <i>tyrB</i>                                                                                                                                                                            |
| Enzyme                           | tyrosine aminotransferase                                                                                                                                                              |
| Reaction                         | 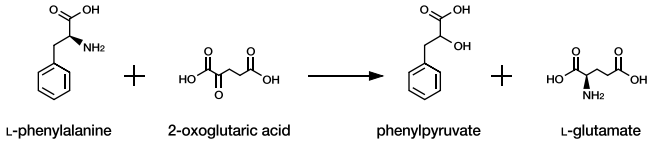 <p>L-phenylalanine + 2-oxoglutaric acid <math>\rightarrow</math> phenylpyruvate + L-glutamate</p> |
| Coenzyme                         | unnecessary                                                                                                                                                                            |
| Kinetics<br>$V_{\max}$ and $K_m$ | L-phenylalanine, 9.1 μmol·min <sup>-1</sup> ·nmol protein <sup>-1</sup> and 333 μM<br>L-tyrosine, 20.0 μmol·min <sup>-1</sup> ·nmol protein <sup>-1</sup> and 625 μM                   |
| Reference                        | [44]                                                                                                                                                                                   |

|                                        |                                                                                                                                                                                         |
|----------------------------------------|-----------------------------------------------------------------------------------------------------------------------------------------------------------------------------------------|
| Gene                                   | <i>UGT72E1</i>                                                                                                                                                                          |
| Enzyme                                 | coniferaldehyde UDP-glucosyl transferase                                                                                                                                                |
| Reaction                               | 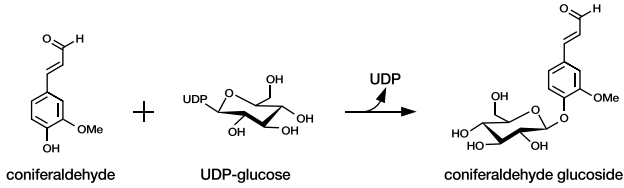 <p>coniferaldehyde + UDP-glucose <math>\xrightarrow{\text{UDP}}</math> coniferaldehyde glucoside</p> |
| Coenzyme                               | unnecessary                                                                                                                                                                             |
| Kinetics<br>$k_{\text{cat}}$ and $K_m$ | coniferaldehyde, 1.22 sec <sup>-1</sup> and 270 μM<br>sinapaldehyde, 1.43 sec <sup>-1</sup> and 460 μM                                                                                  |
| Reference                              | [45]                                                                                                                                                                                    |

|                                        |                                                                                                                                                                             |
|----------------------------------------|-----------------------------------------------------------------------------------------------------------------------------------------------------------------------------|
| Gene                                   | <i>UGT84A2</i>                                                                                                                                                              |
| Enzyme                                 | sinapic acid-1-glucosyltransferase                                                                                                                                          |
| Reaction                               | 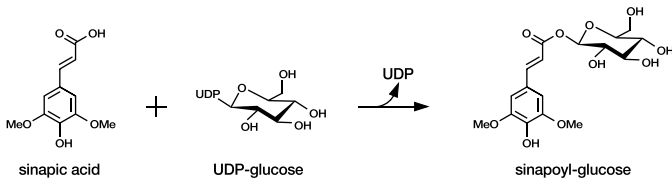 <p>sinapic acid + UDP-glucose <math>\xrightarrow{\text{UDP}}</math> sinapoyl-glucose</p> |
| Coenzyme                               | unnecessary                                                                                                                                                                 |
| Kinetics<br>$V_{\text{max}}$ and $K_m$ | sinapic acid, 13.44 nkat·mg <sup>-1</sup> and 250 μM                                                                                                                        |
| Reference                              | [46]                                                                                                                                                                        |

|                 |                                                                                                                                                         |
|-----------------|---------------------------------------------------------------------------------------------------------------------------------------------------------|
| Gene            | <i>VpVAN</i>                                                                                                                                            |
| Enzyme          | vanillin synthase                                                                                                                                       |
| Reaction        | 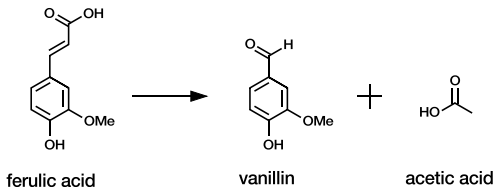 <p>ferulic acid <math>\rightarrow</math> vanillin + acetic acid</p> |
| Coenzyme        | unnecessary                                                                                                                                             |
| Substrate range | ferulic acid and ferulic acid glucoside                                                                                                                 |
| Reference       | [47]                                                                                                                                                    |

|                                        |                                                                                                                                                                                                     |
|----------------------------------------|-----------------------------------------------------------------------------------------------------------------------------------------------------------------------------------------------------|
| Gene                                   | <i>ydiB</i>                                                                                                                                                                                         |
| Enzyme                                 | quinic acid/shikimic acid 5-dehydrogenase                                                                                                                                                           |
| Reaction                               | 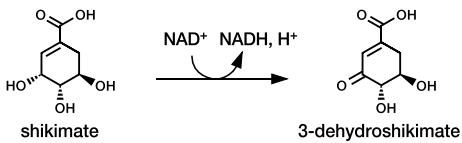 <p>shikimate <math>\xrightarrow{\text{NAD}^+ \rightarrow \text{NADH}, \text{H}^+}</math> 3-dehydroshikimate</p> |
| Coenzyme                               | NAD <sup>+</sup>                                                                                                                                                                                    |
| Kinetics<br>$k_{\text{cat}}$ and $K_m$ | shikimic acid, 91000 sec <sup>-1</sup> and 2.9 μM<br>quinic acid, 113000 sec <sup>-1</sup> and 9.1 μM                                                                                               |
| Reference                              | [48]                                                                                                                                                                                                |

**Table S3.** List of plants generated and mixed *Agrobacterium* strains harboring different gene constructs used for seven independent inoculation procedures.

| Gene set | Gene                        | Number of plants | Efficiency (%) |      |
|----------|-----------------------------|------------------|----------------|------|
| 1        | Single-gene introduction    | <i>CASHT</i>     | 9              | 18.4 |
|          |                             | <i>pdv</i>       | 7              | 14.3 |
|          |                             | <i>CCMT1</i>     | 7              | 14.3 |
|          |                             | <i>tyrB</i>      | 6              | 12.2 |
|          |                             | <i>THT10</i>     | 5              | 10.2 |
|          |                             | <i>FDC1</i>      | 4              | 8.2  |
|          |                             | <i>couA</i>      | 2              | 4.1  |
|          |                             | <i>Atu1417</i>   | 0              | 0    |
|          | Multiple-genes introduction | 9                | -              |      |
| Subtotal | 49                          | -                |                |      |
| 2        | Single-gene introduction    | <i>rpaI</i>      | 11             | 26.2 |
|          |                             | <i>STS2</i>      | 7              | 16.7 |
|          |                             | <i>C2H</i>       | 6              | 14.3 |
|          |                             | <i>CURS3</i>     | 2              | 4.8  |
|          |                             | <i>PKS1</i>      | 2              | 4.8  |
|          |                             | <i>AT208</i>     | 2              | 4.8  |
|          |                             | <i>CHS5</i>      | 1              | 2.4  |
|          | Multiple-genes introduction | 11               | -              |      |
| Subtotal | 42                          | -                |                |      |
| 3        | Single-gene introduction    | <i>3AT2</i>      | 11             | 22.4 |
|          |                             | <i>HCBT</i>      | 8              | 16.3 |
|          |                             | <i>ACT</i>       | 6              | 12.2 |
|          |                             | <i>HCT2</i>      | 5              | 10.2 |
|          |                             | <i>OsHCT4</i>    | 5              | 10.2 |
|          |                             | <i>RAS</i>       | 2              | 4.1  |
|          |                             | <i>SDT</i>       | 2              | 4.1  |
|          |                             | <i>CYP84A4</i>   | 2              | 4.1  |
|          | Multiple-genes introduction | 8                | -              |      |
| Subtotal | 49                          | -                |                |      |
| 4        | Single-gene introduction    | <i>CALipB</i>    | 8              | 16.3 |
|          |                             | <i>SPC4</i>      | 8              | 16.3 |
|          |                             | <i>UGT84A2</i>   | 6              | 12.2 |
|          |                             | <i>BrRCD</i>     | 4              | 8.2  |
|          |                             | <i>F5H</i>       | 4              | 8.2  |
|          |                             | <i>PFOMT</i>     | 3              | 6.1  |
|          |                             | <i>slr0095</i>   | 2              | 4.1  |
|          |                             | <i>VpVAN</i>     | 2              | 4.1  |
|          | Multiple-genes introduction | 12               | -              |      |
| Subtotal | 49                          | -                |                |      |

**Table S3. continued**

| Gene set | Gene                        | Number of Plants            | Efficiency (%) |      |
|----------|-----------------------------|-----------------------------|----------------|------|
| 5        | Single-gene introduction    | <i>Balat_0669</i>           | 8              | 16.3 |
|          |                             | <i>calB</i>                 | 8              | 16.3 |
|          |                             | <i>HHT1</i>                 | 5              | 10.2 |
|          |                             | <i>HCALDH</i>               | 5              | 10.2 |
|          |                             | <i>CGT</i>                  | 4              | 8.2  |
|          |                             | <i>F6H1</i>                 | 4              | 8.2  |
|          |                             | <i>UGT72E1</i>              | 4              | 8.2  |
|          |                             | <i>padC</i>                 | 0              | 0    |
|          |                             | Multiple-genes introduction | 11             | -    |
|          |                             | Subtotal                    | 49             | -    |
| 6        | Single-gene introduction    | <i>CYP98A22</i>             | 7              | 16.3 |
|          |                             | <i>CA9OMT</i>               | 6              | 14   |
|          |                             | <i>CADH</i>                 | 3              | 9.3  |
|          |                             | <i>calA</i>                 | 4              | 9.3  |
|          |                             | <i>ligL</i>                 | 2              | 4.7  |
|          |                             | <i>ydiB</i>                 | 2              | 4.7  |
|          |                             | <i>SNG1</i>                 | 2              | 4.7  |
|          |                             | Multiple-genes introduction | 16             | -    |
| Subtotal | 43                          | -                           |                |      |
| 7        | Single-gene introduction    | <i>pcaG2 +<br/>pcaH2</i>    | 8              | 53.3 |
|          |                             | <i>pcaG +<br/>pcaH</i>      | 7              | 46.7 |
|          | Multiple-genes introduction | 0                           | -              |      |
|          | Subtotal                    | 15                          | -              |      |

The number of transgenic plants generated with a single gene and with multiple transgenes are indicated in the third column. Efficiency refers to the relative proportions of plants harboring a particular gene among all of the plants generated with the same mixture of *Agrobacterium* strains.



**Table S4.** Relative abundance of pyrolysis products within AIR-sample from wild-type and transgenic inflorescence stem

| No. | Products                 | Structural feature | Wild type    | <i>PkC4Hpro::<br/>F5H</i> | <i>PkC4Hpro::<br/>calB</i> | <i>PkC4Hpro::<br/>couA</i> | <i>PkC4Hpro::<br/>F6H1</i> |
|-----|--------------------------|--------------------|--------------|---------------------------|----------------------------|----------------------------|----------------------------|
| 1   | Phenol                   | H, unsub           | 0.8 (0.36)   | 0.49 (0.26)               | 0.65 (0.21)                | 1.36 (0.24)*               | 0.81 (0.3)                 |
| 2   | 2-methylphenol           | H, unsub           | 0.19 (0.06)  | 0.08 (0.05)*              | 0.16 (0.05)                | 0.23 (0.04)                | 0.15 (0.07)                |
| 3   | 4-Methylphenol           | H, unsub           | 0.41 (0.14)  | 0.21 (0.12)*              | 0.36 (0.07)                | 0.65 (0.1)*                | 0.42 (0.15)                |
| 4   | Guaiacol                 | G, unsub           | 2.87 (0.56)  | 0.56 (0.49)***            | 2.73 (0.2)                 | 2.79 (0.31)                | 2.56 (0.38)                |
| 5   | hydroquinone             | H, misc            | 1.4 (0.44)   | 0.85 (0.52)               | 1.4 (0.36)                 | 1.98 (0.48)                | 1.55 (0.5)                 |
| 6   | 4-ethylphenol            | H, ethyl           | ND           | ND                        | ND                         | 0.01 (0.01)                | 0.01 (0.02)                |
| 7   | 2,4-dimethylphenol       | H, methyl          | 1.12 (0.14)  | 0.22 (0.25)***            | 1.13 (0.15)                | 1.1 (0.17)                 | 1.26 (0.22)                |
| 8   | 4-methylguaiacol         | G, methyl          | 1.36 (0.14)  | 0.25 (0.3)***             | 1.35 (0.16)                | 1.29 (0.18)                | 1.52 (0.27)                |
| 9   | 4-Ethylguaiacol          | G, ethyl           | 0.15 (0.08)  | ND                        | 0.15 (0.09)                | 0.31 (0.05)**              | 0.15 (0.09)                |
| 10  | 4-Vinylguaiacol          | G, vinyl           | 12.13 (2.15) | 2.34 (2.26)***            | 11.79 (0.74)               | 15.45 (1.71)*              | 11.43 (1.74)               |
| 11  | 4-vinylphenol            | H, vinyl           | 8.09 (1.43)  | 1.56 (1.51)***            | 7.86 (0.49)                | 10.3 (1.14)*               | 7.62 (1.16)                |
| 12  | 3-methoxy-5-methylphenol | G, methyl          | 0.02 (0.02)  | 0.03 (0.02)               | 0.04 (0.02)                | 0.08 (0.05)*               | 0.03 (0.03)                |
| 13  | 4-propenylphenol         | H, methyl          | 0.02 (0.01)  | 0.02 (0.01)               | 0.01 (0.01)                | 0.03 (0.01)                | 0.02 (0.02)                |
| 14  | syringol                 | S, unsub           | 1.38 (0.26)  | 3.51 (0.7)***             | 1.96 (0.32)**              | 1.99 (0.39)**              | 1.79 (0.35)*               |
| 15  | Eugenol                  | G, misc            | 0.61 (0.08)  | 0.13 (0.14)***            | 0.59 (0.07)                | 0.41 (0.07)**              | 0.64 (0.12)                |
| 16  | 4-hydroxybenzaldehyde    | H, C $\alpha$ -O   | 0.03 (0.01)  | 0.02 (0.01)               | 0.02 (0.02)                | 0.06 (0.04)                | 0.03 (0.03)                |
| 17  | 4-Propylguaiacol         | G, misc            | 0.27 (0.05)  | 0.05 (0.07)***            | 0.27 (0.05)                | 0.33 (0.04)*               | 0.28 (0.05)                |
| 18  | Vanillin                 | G, C $\alpha$ -O   | 1.01 (0.11)  | 0.21 (0.17)***            | 0.93 (0.12)                | 0.88 (0.07)                | 0.98 (0.13)                |
| 19  | cis-isoeugenol           | G, misc            | 0.49 (0.1)   | 0.11 (0.11)***            | 0.47 (0.07)                | 0.38 (0.05)                | 0.5 (0.1)                  |
| 20  | 4-methylsyringol         | S, methyl          | 0.71 (0.13)  | 1.46 (0.29)***            | 1.01 (0.15)**              | 1.08 (0.12)***             | 1.11 (0.14)***             |
| 21  | trans-Isoeugenol         | G, misc            | 3.4 (0.64)   | 0.76 (0.76)***            | 3.32 (0.37)                | 2.6 (0.31)*                | 3.5 (0.67)                 |
| 22  | 4-propyneguaiacol        | G, misc            | 0.35 (0.06)  | 0.16 (0.05)***            | 0.31 (0.06)                | 0.29 (0.06)                | 0.32 (0.08)                |
| 23  | 4-alleneguaiacol         | G, misc            | 0.31 (0.06)  | 0.14 (0.04)**             | 0.27 (0.06)                | 0.25 (0.05)                | 0.28 (0.06)                |
| 24  | acetovanilone            | G, C $\alpha$ -O   | 1.08 (0.03)  | 0.25 (0.2)***             | 0.99 (0.05)**              | 1.34 (0.15)**              | 1.06 (0.13)                |
| 25  | 4-ethylsyringol          | S, ethyl           | 0.05 (0.01)  | 0.12 (0.04)**             | 0.08 (0.02)*               | 0.11 (0.02)***             | 0.07 (0.02)*               |
| 26  | Guaiacylacetone          | G, C $\beta$ -O    | 1.21 (0.11)  | 0.25 (0.27)***            | 1.19 (0.04)                | 1.1 (0.06)                 | 1.34 (0.21)                |
| 27  | 4-vinylsyringol          | S, vinyl           | 5.29 (0.73)  | 13.16 (2.94)***           | 7.22 (1.28)**              | 9.26 (0.82)***             | 6.87 (1.05)**              |
| 28  | 4-allylsyringol          | S, misc            | 0.42 (0.06)  | 1.2 (0.35)***             | 0.6 (0.1)**                | 0.65 (0.09)***             | 0.62 (0.08)***             |
| 29  | homosyringaldehyde       | S, C $\beta$ -O    | 0.08 (0.01)  | 0.18 (0.05)***            | 0.11 (0.02)*               | 0.13 (0.02)***             | 0.11 (0.02)**              |
| 30  | cis-4-propenylsyringol   | S, misc            | 0.29 (0.05)  | 0.8 (0.25)***             | 0.41 (0.08)**              | 0.49 (0.07)***             | 0.42 (0.07)**              |
| 31  | Syringaldehyde           | S, C $\alpha$ -O   | 0.9 (0.13)   | 2.8 (0.34)***             | 1.29 (0.15)***             | 1.05 (0.22)                | 1.29 (0.18)***             |
| 32  | cis-Coniferyl-alcohol    | G, C $\alpha$ -O   | 3.45 (0.18)  | 0.69 (0.8)***             | 3.14 (0.27)*               | 2.45 (0.24)***             | 3.15 (0.27)*               |
| 33  | 4-propynesyringol        | S, misc            | 0.22 (0.03)  | 0.76 (0.27)***            | 0.31 (0.05)***             | 0.34 (0.05)***             | 0.29 (0.05)**              |
| 34  | 4-allenesyringol         | S, misc            | 0.16 (0.02)  | 0.52 (0.18)***            | 0.22 (0.04)**              | 0.24 (0.04)***             | 0.2 (0.03)*                |
| 35  | trans-4-propenylsyringol | S, misc            | 2 (0.35)     | 5.55 (1.71)***            | 2.85 (0.53)**              | 3.36 (0.47)***             | 2.89 (0.44)**              |
| 36  | acetosyringone           | S, C $\alpha$ -O   | 0.11 (0.15)  | 1.06 (0.32)***            | 0.25 (0.19)                | 0.36 (0.23)*               | 0.35 (0.15)*               |
| 37  | Coniferylaldehyde        | G, C $\gamma$ -O   | 1.12 (0.88)  | ND                        | 0.54 (0.78)                | 0.16 (0.3)                 | 1.27 (0.74)                |
| 38  | trans-coniferyl-alcohol  | G, C $\gamma$ -O   | 30.77 (2.46) | 7.07 (5.66)***            | 26.41 (3.03)*              | 19.46 (1.83)***            | 24.87 (3.24)**             |
| 39  | Syringylacetone          | S, C $\beta$ -O    | 0.17 (0.02)  | 0.54 (0.12)***            | 0.24 (0.04)***             | 0.32 (0.04)***             | 0.25 (0.05)***             |
| 41  | Coniferylacetate         | S, C $\gamma$ -O   | 0.01 (0)     | ND                        | 0.01 (0)                   | 0.01 (0.01)*               | 0.02 (0)*                  |
| 42  | cis-Sinapyl alcohol      | S, C $\gamma$ -O   | 1.22 (0.19)  | 3.72 (0.49)***            | 1.54 (0.11)*               | 1.45 (0.25)                | 1.6 (0.25)**               |
| 43  | trans-sinapaldehyde      | S, C $\gamma$ -O   | 0.08 (0.09)  | 0.65 (0.49)*              | 0.08 (0.12)                | 0.02 (0.03)                | 0.13 (0.09)                |
| 44  | trans-sinapyl-alcohol    | S, C $\gamma$ -O   | 14.26 (3.74) | 47.49 (11.44)***          | 15.73 (1.78)               | 13.81 (2.95)               | 15.61 (4.53)               |

Peak molar areas were calculated for the lignin degradation products with relative response factor reported by van Erven (2017). □

The summed areas were normalized, and the amount of each compound is expressed as percentages.

Numbers in parentheses are 95% confidential intervals.

**Table S5.** carbohydrates composition in transgenic lines supporting Fig.6

| Lines                 | Carbohydrates ( $\mu\text{g}/\text{mgAIR}$ ) |          |           |               |             |             |               |              |                |               | Total carbohydrates ( $\mu\text{g}/\text{mgAIR}$ ) |
|-----------------------|----------------------------------------------|----------|-----------|---------------|-------------|-------------|---------------|--------------|----------------|---------------|----------------------------------------------------|
|                       | Glc                                          | Xyl      | GalA      | Rha           | Man         | Gal         | Ara           | GlcA         | mGlcA          | Fuc           |                                                    |
| Wild-type             | 377 (16)                                     | 145 (7)  | 119 (9)   | 44.9 (2.9)    | 30.5 (1.1)  | 22.1 (2)    | 12.7 (2.2)    | 5.92 (0.43)  | 2.03 (0.27)    | 1.07 (0.11)   | 685 (26)                                           |
| <i>PkC4Hpro::F5H</i>  | 381 (9)                                      | 154 (6)* | 120 (11)  | 46 (3.7)      | 31.8 (1.4)  | 23.4 (1.9)  | 14.5 (1.7)    | 6.48 (0.78)  | 2.09 (0.86)    | 1.08 (0.21)   | 702 (41)                                           |
| <i>PkC4Hpro::calB</i> | 377 (10)                                     | 151 (5)  | 130 (9)   | 48 (2.9)      | 31 (1.4)    | 24.2 (1.3)* | 15.1 (1.6)    | 5.91 (0.52)  | 5.92 (2.28)*** | 1.11 (0.19)   | 710 (34)                                           |
| <i>PkC4Hpro::couA</i> | 326 (10)***                                  | 143 (6)  | 140 (6)** | 63.9 (5.1)*** | 31.2 (1.1)  | 36 (3.7)*** | 31.8 (6.3)*** | 6.8 (0.55)** | 7.53 (2.75)*** | 1.21 (0.09)*  | 708 (23)                                           |
| <i>PkC4Hpro::F6H1</i> | 352 (18)*                                    | 133 (8)* | 128 (7)   | 46.5 (2.2)    | 28.3 (1.4)* | 23.5 (1.2)  | 14.2 (1.2)    | 5.71 (0.55)  | 1.87 (1.15)    | 1.23 (0.11)** | 661 (50)                                           |

Numbers in parentheses are 95% confidential intervals.

**Table S6.** sugar yield by enzymatic saccharification supporting to Fig.7

| Line                  | Glucose yield ( $\mu\text{g}/\text{mgAIR}$ ) |                               | Xylose yield ( $\mu\text{g}/\text{mgAIR}$ ) |                               |
|-----------------------|----------------------------------------------|-------------------------------|---------------------------------------------|-------------------------------|
|                       | Without pretreatment                         | Pretreatment with 100 mM NaOH | Without pretreatment                        | Pretreatment with 100 mM NaOH |
| Wild-type             | 126.2 (16)                                   | 136 (11)                      | 3.9 (2)                                     | 87 (5)                        |
| <i>PkC4Hpro::F5H</i>  | 126.1 (12)                                   | 178 (32)*                     | 0.9 (1)*                                    | 127 (16)***                   |
| <i>PkC4Hpro::calB</i> | 133.5 (17)                                   | 164 (25)                      | 4.5 (2)                                     | 108 (12)**                    |
| <i>PkC4Hpro::couA</i> | 144.7 (13)                                   | 210 (17)***                   | 17.9 (7)**                                  | 134 (16)***                   |
| <i>PkC4Hpro::F6H1</i> | 118.8 (7)                                    | 140 (13)                      | 0.8 (1)*                                    | 91 (10)                       |

Numbers in parentheses are 95% confidential intervals.

## References

1. Humphreys JM, Hemm MR, Chapple C: New routes for lignin biosynthesis defined by biochemical characterization of recombinant ferulate 5-hydroxylase, a multifunctional cytochrome P450-dependent monooxygenase. *Proceedings of the National Academy of Sciences of the United States of America*. 1999;96(18):10045-10050.
2. Luo J, Nishiyama Y, Fuell C, Taguchi G, Elliott K, Hill L, Tanaka Y, Kitayama M, Yamazaki M, Bailey P *et al*: Convergent evolution in the BAHD family of acyl transferases: identification and characterization of anthocyanin acyl transferases from *Arabidopsis thaliana*. *Plant J*. 2007;50(4):678-695.
3. Burhenne K, Kristensen BK, Rasmussen SK: A new class of *N*-hydroxycinnamoyltransferases. Purification, cloning, and expression of a barley agmatine coumaroyltransferase (EC 2.3.1.64). *The Journal of biological chemistry*. 2003;278(16):13919-13927.
4. Fujiwara H, Tanaka Y, Yonekura-Sakakibara K, Fukuchi-Mizutani M, Nakao M, Fukui Y, Yamaguchi M, Ashikari T, Kusumi T: cDNA cloning, gene expression and subcellular localization of anthocyanin 5-aromatic acyltransferase from *Gentiana triflora*. *Plant J*. 1998;16(4):421-431.
5. Campillo T, Renoud S, Kerzaon I, Vial L, Baude J, Gaillard V, Bellvert F, Chamignon C, Comte G, Nesme X *et al*: Analysis of hydroxycinnamic acid degradation in *Agrobacterium fabrum* reveals a coenzyme A-dependent,  $\beta$ -oxidative deacetylation pathway. *Appl Environ Microbiol*. 2014;80(11):3341-3349.
6. Raimondi S, Anighoro A, Quartieri A, Amaretti A, Tomás - Barberán F, Rastelli G, Rossi M: Role of bifidobacteria in the hydrolysis of chlorogenic acid. *MicrobiologyOpen*. 2015;4(1):41-52.
7. Kobayashi Y: Screening of bacterial aromatic ring-cleavage dioxygenases for lignin biosynthesis intermediates. *Unpublished Mater's Thesis, Nagaoka University of Technology*. 2016:1-48.
8. Matsumoto S, Mizutani M, Sakata K, Shimizu B: Molecular cloning and functional analysis of the *ortho*-hydroxylases of *p*-coumaroyl coenzyme A/feruloyl coenzyme A involved in formation of umbelliferone and scopoletin in sweet potato, *Ipomoea batatas* (L.) Lam. *Phytochemistry*. 2012;74:49-57.
9. Berim A, Schneider B, Petersen M: Methyl allyl ether formation in plants: novel *S*-adenosyl L-methionine:coniferyl alcohol 9-*O*-methyltransferase from suspension cultures of three *Linum* species. *Plant Mol Biol*. 2007;64(3):279-291.
10. Nishimura M: Molecular cloning and expression of the *Streptomyces* coniferyl alcohol dehydrogenase gene in *Escherichia coli*. *Protein Expr Purif*. 2013;89(1):109-115.
11. Uppenberg J, Hansen MT, Patkar S, Jones TA: The sequence, crystal structure determination and refinement of two crystal forms of lipase B from *Candida antarctica*. *Structure*. 1994;2(4):293-308.
12. Overhage J, Steinbüchel A, Priefert H: Biotransformation of eugenol to ferulic acid by a recombinant strain of *Ralstonia eutropha* H16. *Appl Environ Microbiol*. 2002;68(9):4315-4321.
13. Achterholt S, Priefert H, Steinbüchel A: Purification and characterization of the coniferyl aldehyde dehydrogenase from *Pseudomonas* sp. strain HR199 and molecular characterization of the gene. *J Bacteriol*. 1998;180(17):4387-4391.

14. Back K, Jang SM, Lee BC, Schmidt A, Strack D, Kim KM: Cloning and characterization of a hydroxycinnamoyl-CoA:tyramine *N*-(hydroxycinnamoyl)transferase induced in response to UV-C and wounding from *Capsicum annuum*. *Plant Cell Physiol*. 2001;42(5):475-481.
15. Kapteyn J, Qualley AV, Xie Z, Fridman E, Dudareva N, Gang DR: Evolution of cinnamate/*p*-coumarate carboxyl methyltransferases and their role in the biosynthesis of methylcinnamate. *Plant Cell*. 2007;19(10):3212-3229.
16. Teutschbein J, Gross W, Nimtz M, Milkowski C, Hause B, Strack D: Identification and localization of a lipase-like acyltransferase in phenylpropanoid metabolism of tomato (*Solanum lycopersicum*). *The Journal of biological chemistry*. 2010;285(49):38374-38381.
17. Akada S, Dube SK: Organization of soybean chalcone synthase gene clusters and characterization of a new member of the family. *Plant Mol Biol*. 1995;29(2):189-199.
18. Hirakawa H, Schaefer AL, Greenberg EP, Harwood CS: Anaerobic *p*-coumarate degradation by *Rhodopseudomonas palustris* and identification of CouR, a MarR repressor protein that binds *p*-coumaroyl coenzyme A. *J Bacteriol*. 2012;194(8):1960-1967.
19. Katsuyama Y, Kita T, Horinouchi S: Identification and characterization of multiple curcumin synthases from the herb *Curcuma longa*. *FEBS letters*. 2009;583(17):2799-2803.
20. Weng JK, Li Y, Mo H, Chapple C: Assembly of an evolutionarily new pathway for  $\alpha$ -pyrone biosynthesis in *Arabidopsis*. *Science*. 2012;337(6097):960-964.
21. Vialart G, Hehn A, Olry A, Ito K, Krieger C, Labat R, Paris C, Shimizu B, Sugimoto Y, Mizutani M *et al*: A 2-oxoglutarate-dependent dioxygenase from *Ruta graveolens* L. exhibits *p*-coumaroyl CoA 2'-hydroxylase activity (C2'H): a missing step in the synthesis of umbelliferone in plants. *Plant J*. 2012;70(3):460-470.
22. Kai K, Mizutani M, Kawamura N, Yamamoto R, Tamai M, Yamaguchi H, Sakata K, Shimizu B: Scopoletin is biosynthesized via *ortho*-hydroxylation of feruloyl CoA by a 2-oxoglutarate-dependent dioxygenase in *Arabidopsis thaliana*. *Plant J*. 2008;55(6):989-999.
23. Mukai N, Masaki K, Fujii T, Kawamukai M, Iefuji H: PAD1 and FDC1 are essential for the decarboxylation of phenylacrylic acids in *Saccharomyces cerevisiae*. *J Biosci Bioeng*. 2010;109(6):564-569.
24. Nair RB, Bastress KL, Ruegger MO, Denault JW, Chapple C: The *Arabidopsis thaliana* *REDUCED EPIDERMAL FLUORESCENCE1* gene encodes an aldehyde dehydrogenase involved in ferulic acid and sinapic acid biosynthesis. *Plant Cell*. 2004;16(2):544-554.
25. Yang Q, Reinhard K, Schiltz E, Matern U: Characterization and heterologous expression of hydroxycinnamoyl/benzoyl-CoA:anthranilate *N*-hydroxycinnamoyl/benzoyltransferase from elicited cell cultures of carnation, *Dianthus caryophyllus* L. *Plant Mol Biol*. 1997;35(6):777-789.
26. Sullivan M: A novel red clover hydroxycinnamoyl transferase has enzymatic activities consistent with a role in phaselic acid biosynthesis. *Plant Physiol*. 2009;150(4):1866-1879.
27. Gou JY, Yu XH, Liu CJ: A hydroxycinnamoyltransferase responsible for synthesizing suberin aromatics in *Arabidopsis*. *Proceedings of the National Academy of Sciences of the United States of America*. 2009;106(44):18855-18860.

28. Sato Y, Moriuchi H, Hishiyama S, Otsuka Y, Oshima K, Kasai D, Nakamura M, Ohara S, Katayama Y, Fukuda M *et al*: Identification of three alcohol dehydrogenase genes involved in the stereospecific catabolism of arylglycerol- $\beta$ -aryl ether by *Sphingobium* sp. strain SYK-6. *Appl Environ Microbiol*. 2009;75(16):5195-5201.
29. Kim IA, Kim BG, Kim M, Ahn JH: Characterization of hydroxycinnamoyltransferase from rice and its application for biological synthesis of hydroxycinnamoyl glycerols. *Phytochemistry*. 2012;76:25-31.
30. Cavin JF, Dartois V, Divies C: Gene cloning, transcriptional analysis, purification, and characterization of phenolic acid decarboxylase from *Bacillus subtilis*. *Appl Environ Microbiol*. 1998;64(4):1466-1471.
31. Guzik U, Hupert-Kocurek K, Sitnik M, Wojcieszynska D: Protocatechuate 3,4-dioxygenase: a wide substrate specificity enzyme isolated from *Stenotrophomonas maltophilia* KB2 as a useful tool in aromatic acid biodegradation. *Journal of molecular microbiology and biotechnology*. 2014;24(3):150-160.
32. Hammer A, Stolz A, Knackmuss H: Purification and characterization of a novel type of protocatechuate 3,4-dioxygenase with the ability to oxidize 4-sulfocatechol. *Archives of microbiology*. 1996;166(2):92-100.
33. Cavin JF, Barthelmebs L, Guzzo J, Beeumen J, Samyn B, Travers JF, Diviès C: Purification and characterization of an inducible *p* - coumaric acid decarboxylase from *Lactobacillus plantarum*. *FEMS Microbiol Lett*. 1997;147(2):291-295.
34. Ibdah M, Zhang XH, Schmidt J, Vogt T: A novel Mg<sup>2+</sup>-dependent *O*-methyltransferase in the phenylpropanoid metabolism of *Mesembryanthemum crystallinum*. *The Journal of biological chemistry*. 2003;278(45):43961-43972.
35. Brand S, Hölscher D, Schierhorn A, Svatoš A, Schröder J, Schneider B: A type III polyketide synthase from *Wachendorfia thyrsiflora* and its role in diarylheptanoid and phenylphenalenone biosynthesis. *Planta*. 2006;224(2):413-428.
36. Schaefer AL, Greenberg EP, Oliver CM, Oda Y, Huang JJ, Bittan-Banin G, Peres CM, Schmidt S, Juhaszova K, Sufirin JR *et al*: A new class of homoserine lactone quorum-sensing signals. *Nature*. 2008;454(7204):595-599.
37. Weitzel C, Petersen M: Cloning and characterisation of rosmarinic acid synthase from *Melissa officinalis* L. *Phytochemistry*. 2011;72(7):572-578.
38. Luo J, Fuell C, Parr A, Hill L, Bailey P, Elliott K, Fairhurst SA, Martin C, Michael AJ: A novel polyamine acyltransferase responsible for the accumulation of spermidine conjugates in *Arabidopsis* seed. *Plant Cell*. 2009;21(1):318-333.
39. Kopycki JG, Stubbs MT, Brandt W, Hagemann M, Porzel A, Schmidt J, Schliemann W, Zenk MH, Vogt T: Functional and structural characterization of a cation-dependent *O*-methyltransferase from the cyanobacterium *Synechocystis* sp. strain PCC 6803. *The Journal of biological chemistry*. 2008;283(30):20888-20896.
40. Chapple CC, Vogt T, Ellis BE, Somerville CR: An *Arabidopsis* mutant defective in the general phenylpropanoid pathway. *Plant Cell*. 1992;4(11):1413-1424.

41. Dicko MH, Gruppen H, Hilhorst R, Voragen AG, van Berkel WJ: Biochemical characterization of the major sorghum grain peroxidase. *FEBS J.* 2006;273(10):2293-2307.
42. Melchior F, Kindl H: Grapevine stilbene synthase cDNA only slightly differing from chalcone synthase cDNA Is expressed in *Escherichia coli* into a catalytically active enzyme. *FEBS letters.* 1990;268(1):17-20.
43. Negrel J, Javelle F: Purification, characterization and partial amino acid sequencing of hydroxycinnamoyl-CoA:tyramine *N*-(hydroxycinnamoyl)transferase from tobacco cell-suspension cultures. *European journal of biochemistry / FEBS.* 1997;247(3):1127-1135.
44. Mavrides C, Orr W: Multispecific aspartate and aromatic amino acid aminotransferases in *Escherichia coli*. *The Journal of biological chemistry.* 1975;250(11):4128-4133.
45. Lim EK, Jackson RG, Bowles DJ: Identification and characterisation of *Arabidopsis* glycosyltransferases capable of glucosylating coniferyl aldehyde and sinapyl aldehyde. *FEBS letters.* 2005;579(13):2802-2806.
46. Lim EK, Li Y, Parr A, Jackson R, Ashford DA, Bowles DJ: Identification of glucosyltransferase genes involved in sinapate metabolism and lignin synthesis in *Arabidopsis*. *The Journal of biological chemistry.* 2001;276(6):4344-4349.
47. Gallage NJ, Hansen EH, Kannangara R, Olsen CE, Motawia MS, Jorgensen K, Holme I, Hebelstrup K, Grisoni M, Moller BL: Vanillin formation from ferulic acid in *Vanilla planifolia* is catalysed by a single enzyme. *Nat Commun.* 2014;5:4037.
48. Lindner HA, Nadeau G, Matte A, Michel G, Menard R, Cygler M: Site-directed mutagenesis of the active site region in the quinate/shikimate 5-dehydrogenase YdiB of *Escherichia coli*. *The Journal of biological chemistry.* 2005;280(8):7162-7169.
49. Fujiwara H, Tanaka Y, Fukui Y, Ashikari T, Yamaguchi M, Kusumi T: Purification and characterization of anthocyanin 3-aromatic acyltransferase from *Perilla frutescens*. *Plant Science.* 1998;137(1):87-94.
50. Nishimura M, Kohno K, Nishimura Y, Inagaki M, Davies J: Characterization of two isozymes of coniferyl alcohol dehydrogenase from *Streptomyces* sp. NL15-2K. *Biosci Biotechnol Biochem.* 2011;75(9):1770-1777.
51. Weitkamp P, Vosmann K, Weber N: Highly efficient preparation of lipophilic hydroxycinnamates by solvent-free lipase-catalyzed transesterification. *J Agric Food Chem.* 2006;54(19):7062-7068.
52. Stevenson DE, Parkar SG, Zhang JL, Stanley RA, Jensen DJ, Cooney JA: Combinatorial enzymic synthesis for functional testing of phenolic acid esters catalysed by *Candida antarctica* lipase B (Novozym 435 (R)). *Enzyme Microb Technol.* 2007;40(5):1078-1086.
53. Jang SM, Ishihara A, Back K: Production of coumaroylserotonin and feruloylserotonin in transgenic rice expressing pepper hydroxycinnamoyl-coenzyme A:serotonin *N*-(hydroxycinnamoyl)transferase. *Plant Physiol.* 2004;135(1):346-356.
54. Strack D, Gross W: Properties and activity changes of chlorogenic acid:glucaric acid caffeoyltransferase from Tomato (*Lycopersicon esculentum*). *Plant Physiol.* 1990;92(1):41-47.
55. Welle R, Grisebach H: Purification and properties of chalcone synthase from cell suspension cultures

of soybean. *Z Naturforsch C*. 1987;42(c):1200-1206.

56. Lin F, Ferguson KL, Boyer DR, Lin XN, Marsh EN: Isofunctional enzymes PAD1 and UbiX catalyze formation of a novel cofactor required by ferulic acid decarboxylase and 4-hydroxy-3-polyprenylbenzoic acid decarboxylase. *ACS Chem Biol*. 2015;10(4):1137-1144.
57. Anderson NA, Bonawitz ND, Nyffeler K, Chapple C: Loss of FERULATE 5-HYDROXYLASE leads to mediator-dependent inhibition of soluble phenylpropanoid biosynthesis in *Arabidopsis*. *Plant Physiol*. 2015;169(3):1557-1567.
58. Eudes A, Baidoo EE, Yang F, Burd H, Hadi MZ, Collins FW, Keasling JD, Loque D: Production of tranilast [*N*-(3',4'-dimethoxycinnamoyl)-anthranilic acid] and its analogs in yeast *Saccharomyces cerevisiae*. *Appl Microbiol Biotechnol*. 2011;89(4):989-1000.
59. Pereira JH, Heins RA, Gall DL, McAndrew RP, Deng K, Holland KC, Donohue TJ, Noguera DR, Simmons BA, Sale KL *et al*: Structural and biochemical characterization of the early and late enzymes in the lignin  $\beta$ -aryl ether cleavage pathway from *Sphingobium* sp. SYK-6. *J Biol Chem*. 2016;291(19):10228-10238.
